# Supplementary material for: Crystal structure, molecular packing, FMO, NBO, nonlinear optical and optical limiting properties of an organic imidazolium diphenylacetate diphenylacetic acid single crystal
Source: Royal Society of Chemistry journal article supplement (doi:10.1039/c7nj03693k), 2018-01-01
Supplement: c7nj03693k1.pdf [file c7nj03693k1.pdf]

## Crystal structure, molecular packing, FMO, NBO, nonlinear optical and optical limiting properties of an organic imidazolium diphenylacetate diphenylacetic acid single crystal

RO.MU. Jauhar<sup>a</sup>, Paavai . Era<sup>a</sup>, V. Viswanathan<sup>b</sup>, P. Vivek<sup>c</sup>, G. Vinitha<sup>d</sup>,  
D. Velmurugan<sup>b</sup>, P. Murugakoothan<sup>a\*</sup>

<sup>a</sup>MRDL, PG and Research Department of Physics, Pachaiyappa's College, Chennai – 600 030.

<sup>b</sup>Centre of Advanced Study in Crystallography and Biophysics, University of Madras, Guindy Campus, Chennai - 600 025.

<sup>c</sup>Sri Sankara Arts and Science College (Autonomous), Enathur, Kancheepuram – 631 561, India.

<sup>d</sup>Division of Physics, School of Advanced Sciences, VIT University, Chennai - 600 127.

E-mail: [murugakoothan03@yahoo.com](mailto:murugakoothan03@yahoo.com)

Tel: +91 9444447586

### ELECTRONIC SUPPLEMENTARY INFORMATION

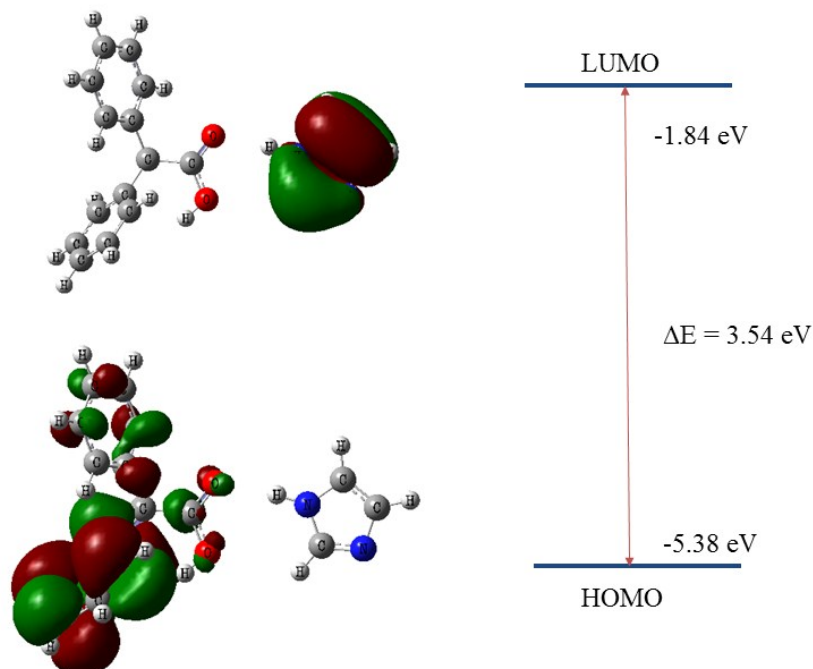

Figure S1 HOMO-LUMO plot of IDA crystal

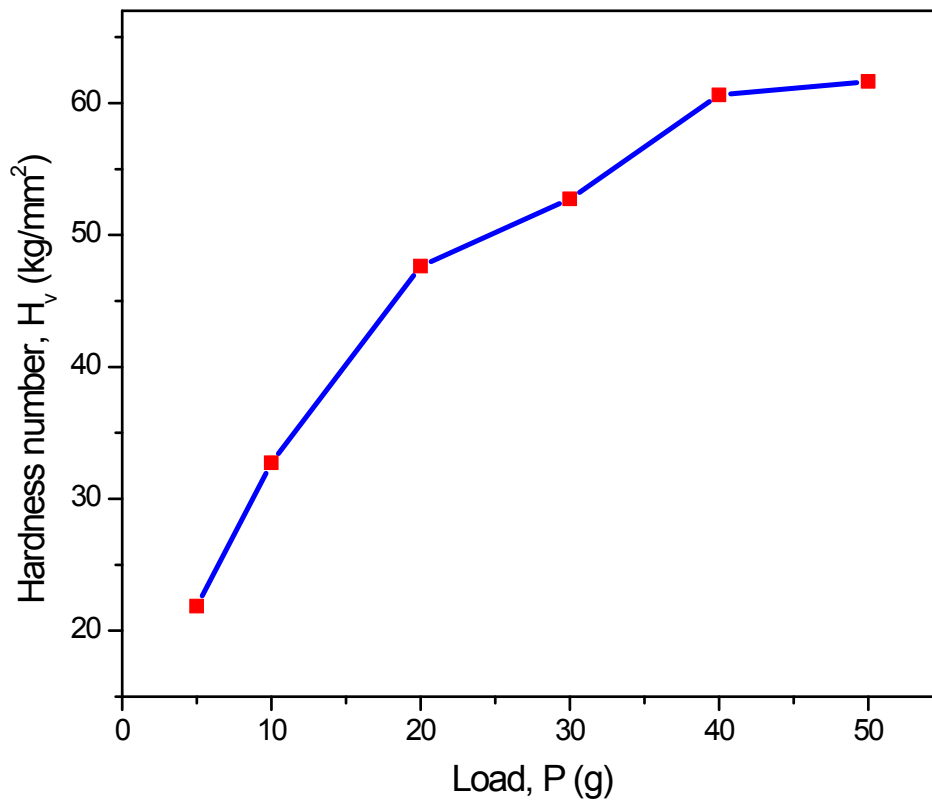

**Figure S2 Plot of Load, P vs hardness number,  $H_v$  of IDA crystal**

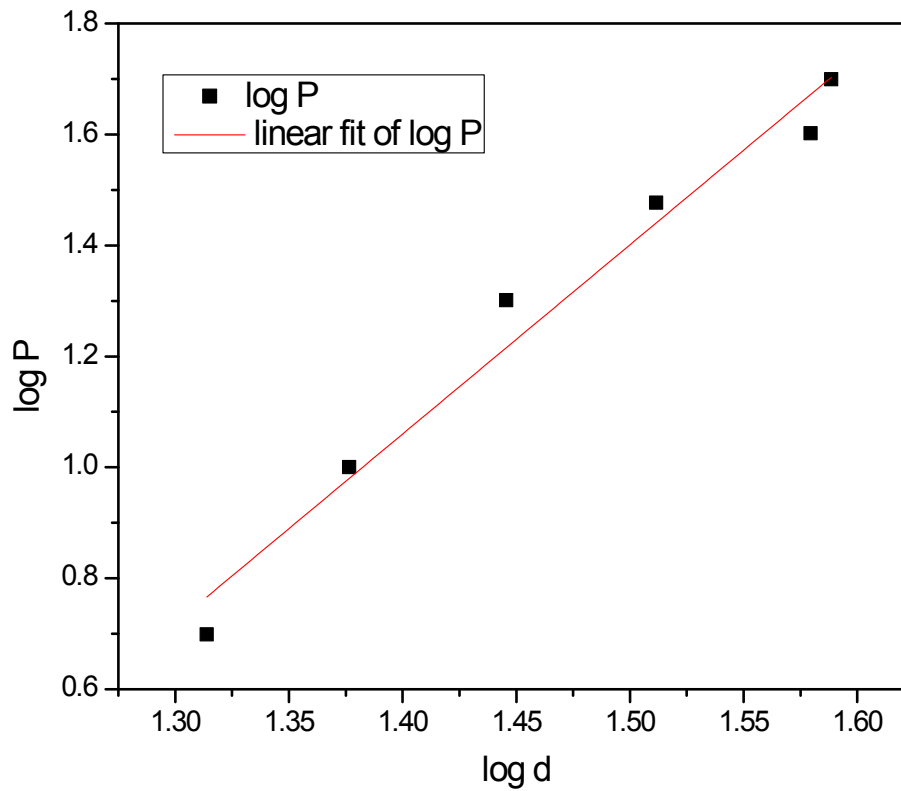

**Figure S3 Plot of  $\log d$  vs  $\log P$**
